# Supplementary material
Source: PubMed Central journal article supplement (PMC3685246)
Supplement: AEM.00149-13_zam999104373so1.pdf [file AEM.00149-13_zam999104373so1.pdf]

2 Supplemental materials

3 Improving *Escherichia coli* FucO for Furfural Tolerance by

4 Saturation Mutagenesis of Individual Amino Acid Positions

5

6 Huabao Zheng, Xuan Wang, Lorraine P. Yomano, Ryan D. Geddes,

7 Keelnatham T. Shanmugam, and Lonnie O. Ingram\*

8

9 Department of Microbiology and Cell Science, University of Florida, Gainesville, FL

10 32611

11

12 \*To whom correspondence may be addressed. Email: [ingram@ufl.edu](mailto:ingram@ufl.edu)

13 Lonnie O. Ingram

14 Dept. Micro & Cell Science

15 UF Box 110700

16 Gainesville, FL 32611

17

18 Email for other authors: [huabaozheng@ufl.edu](mailto:huabaozheng@ufl.edu)

19 [wangxuan@ufl.edu](mailto:wangxuan@ufl.edu)

20 [Skylos2@ufl.edu](mailto:Skylos2@ufl.edu)

21 [rgeddes@ufl.edu](mailto:rgeddes@ufl.edu)

22 [Shan@ufl.edu](mailto:Shan@ufl.edu)

23

24 **FIG. S1** Growth-based screening by using the Bioscreen C, When OD ranged from 1.1  
25 to 1.4, 15  $\mu$ l seed cultures (AM1 medium, 5% xylose, 50  $\mu$ g ml<sup>-1</sup> Amp, ) was inoculated  
26 into 0.39 ml screening culture (AM1medium, 5% xylose, 12.5  $\mu$ g ml<sup>-1</sup> Amp, 0.025 mM  
27 ITPG, 12.5 mM furfural). Plates were incubated at 37°C and shaken for 10 seconds at  
28 30 minutes intervals.

29

30 1. **FIG. S2** Prediction of RNA secondary structure and free energy calculation by the  
31 mfold web server (Zuker, M., Nucleic Acids Res. 31:3406-3415, 2003). A total of 45  
32 nucleic acid bases (nt -7 to nt 37) were used for calculation. One RNA secondary  
33 structure was predicted for wild-type *fucO* gene (A). The three most stable structures  
34 for the *fucOL7F* mutant are included for comparison (B, C, D).

35
