# Supplementary material
Source: PubMed Central journal article supplement (PMC3685246)

**Fig. S1**

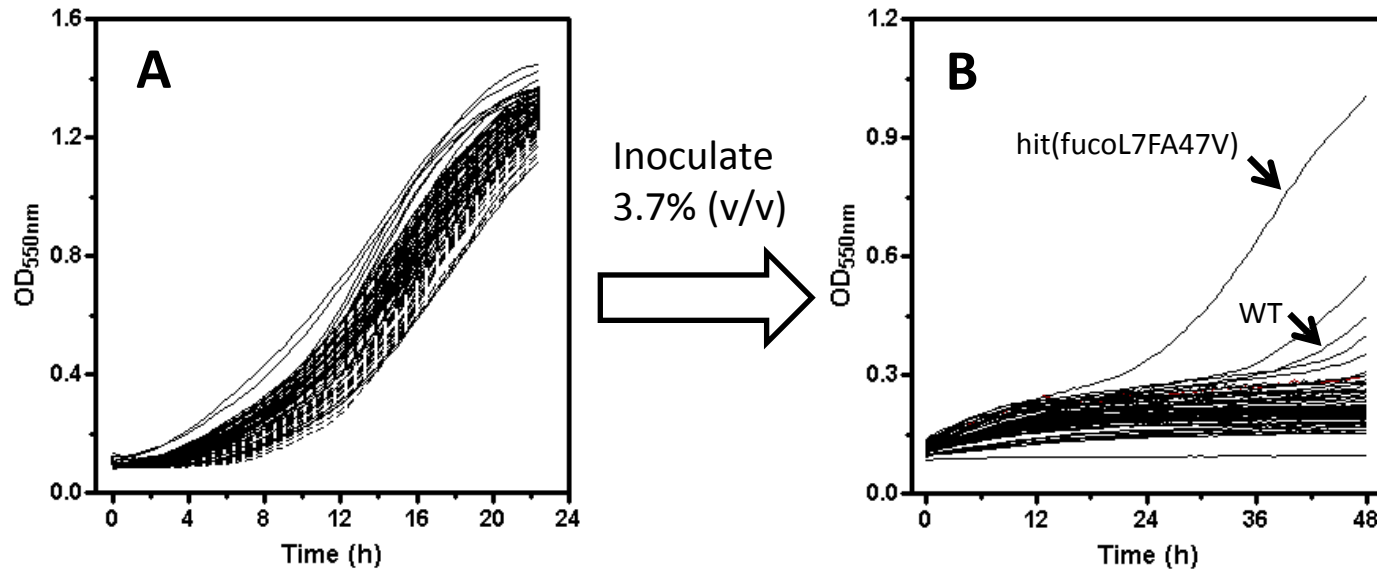

Fig. S2 A

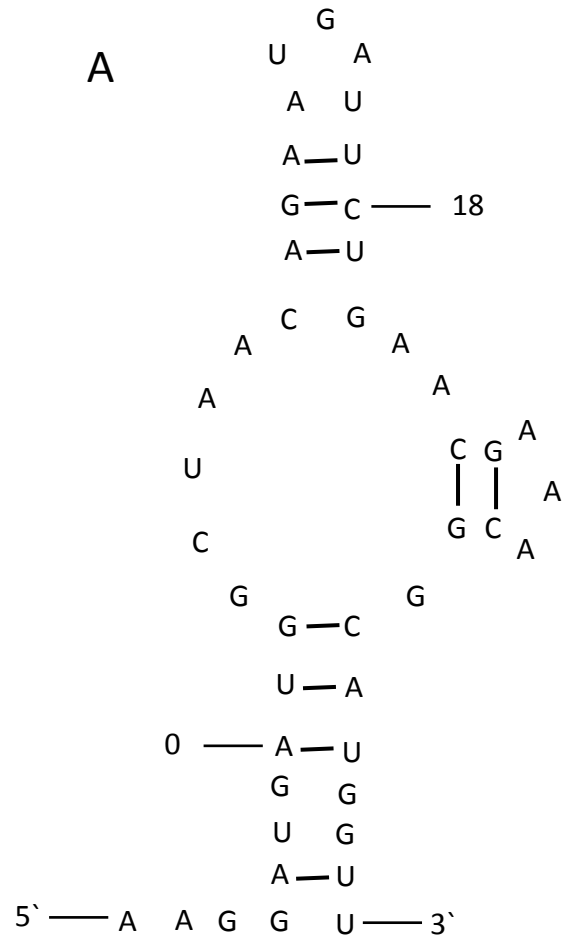

**Fig. S2 B, C, D**

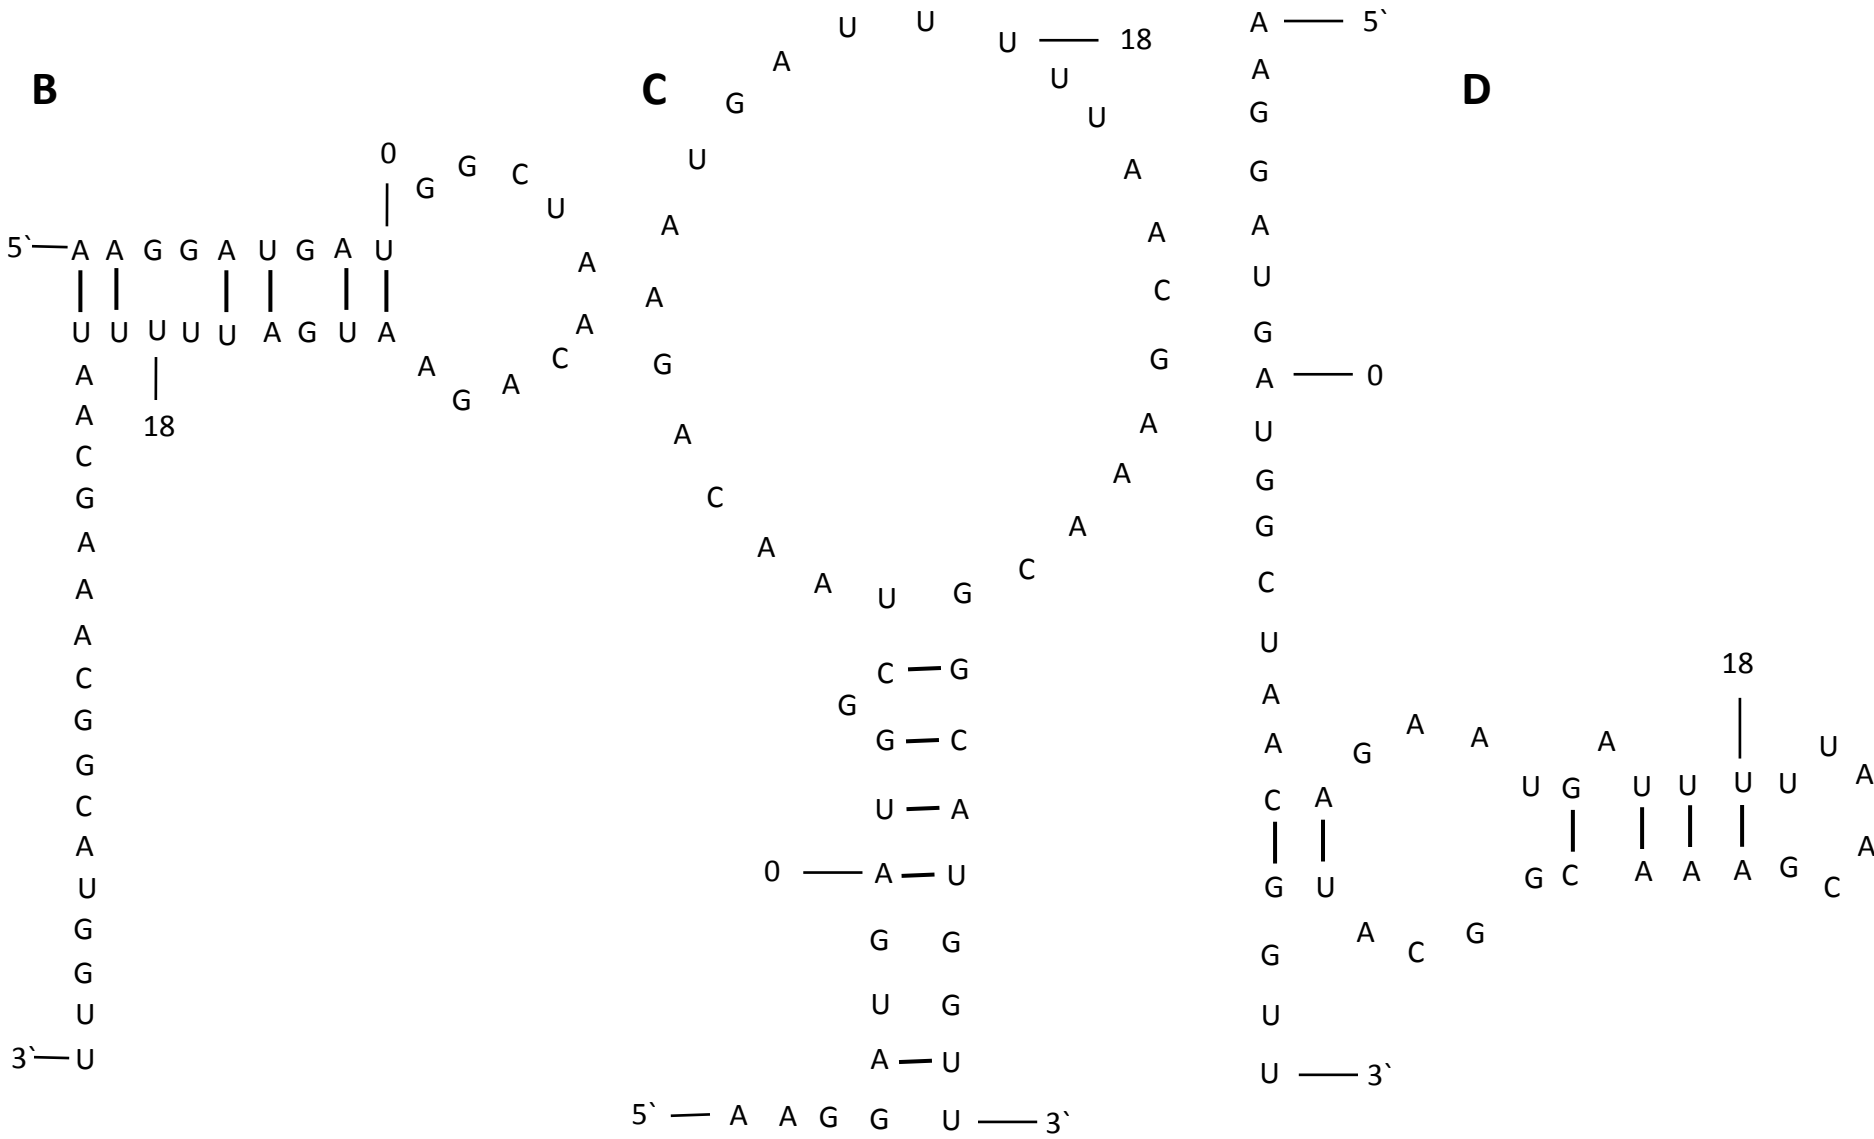

Supplement: AEM.00149-13_zam999104373so2.pdf [file AEM.00149-13_zam999104373so2.pdf]
